# Supplementary material for: Comparative transcriptome analysis of foxtail millet variety JG21 and resistant mutant unravels the key players associated with downy mildew resistance
Source: Research Square preprint supplement (doi:10.21203/rs.3.rs-7495945/v1), 2025-09-18
Supplement: Supplementary file 1 [file Table S1.xls]

## Sheet: Sheet1
Additional file 1 Table S1. Evaluation criteria for resistance to downy mildew of foxtail millet
DM scale	Resistance level	Percentage of diseased panicles(%)
1	Highly resistant（HR）	0.0%-1.1%
3	Moderately resistant（R）	1.1%~5.0%
5	Moderately susceptible（M）	5.1%-10.0%
7	Susceptible（S）	10.1%-40.0%
9	Highly susceptible（HS）	40.1%-100.0%
