# Supplementary material for: Comparative transcriptome analysis of foxtail millet variety JG21 and resistant mutant unravels the key players associated with downy mildew resistance
Source: Research Square preprint supplement (doi:10.21203/rs.3.rs-7495945/v1), 2025-09-18
Supplement: Supplementary file 2 [file Table S2.xls]

## Sheet: Sheet1
Additional file 2 Table S2 Primer sequences designed for quantitative real time RT-PCR.
Code	Gene	5'-3' primer sequences
1	Seita.Actin	F: TGCTCAGTGGAGGCTCAACA
		R: CCAGACACTGTACTTGCGCTC
2	Seita.8G226800.1	F: GGGAAGAAGGCTGTCAAGAAC
		R: GCCGTCGTAGGTGGTGATG
3	Seita.9G351400.1	F: CAGTCCAAGAGGAGGAAGGG
		R: CCTGAAGTAGGCCCTGGGAT
4	Seita.1G082400.1	F:CCTCCGTATCAAGAGCGCAT
		R:ACGTAGGTCCAGTTGCAGTG
5	Seita.5G422800.1	F:CGCCTCAAGACTACCTCACG
		R:CAGCTTCGTGCTCCAGGTAA
6	Seita.8G186100.1	F:CTGGCAGACAGGTTCTACGC
		R:AGACAAGCCTGCTCGCATT
7	Seita.8G202700.1	F:CCAAGGCCAAGACCAATTTCC
		R:GGGAGGATGACTCCACGGT
8	Seita.1G232700.1	F:TGCCCAATGAACTACCAGC
		R:AATCGGTTGCCCATCTTGC
9	Seita.7G329900.1	F:TGGGTGGACTGAAGAACCT
		R:CCAACAGCGACAAGTGAGA
