# Supplementary material for: Comparative transcriptome analysis of foxtail millet variety JG21 and resistant mutant unravels the key players associated with downy mildew resistance
Source: Research Square preprint supplement (doi:10.21203/rs.3.rs-7495945/v1), 2025-09-18
Supplement: Supplementary file 3 [file Table S3.xls]

## Sheet: Sheet1
Additional file 3 Table S3 Quality evaluation of sequencing date
Samples	Total Reads	Mapped Reads	Uniq Mapped Reads	Multiple Map Reads	Reads Map to '+'	Reads Map to '-'	Clean reads	Clean bases	GC(%)	Q30(%)
CK-R12h-1	47317774	45,341,222 (95.82%)	42,330,789 (89.46%)	3,010,433 (6.36%)	27,080,426 (57.23%)	27,016,559 (57.10%)	23658887	7082274370	53.86	95.11
CK-R12h-2	48599610	46,689,084 (96.07%)	44,232,534 (91.01%)	2,456,550 (5.05%)	26,646,201 (54.83%)	26,577,678 (54.69%)	24299805	7277498898	55.12	94.77
CK-R12h-3	48826630	46,671,074 (95.59%)	44,185,157 (90.49%)	2,485,917 (5.09%)	26,475,280 (54.22%)	26,389,809 (54.05%)	24413315	7307024888	54.89	94.77
CK-R24h-1	42168042	40,248,914 (95.45%)	38,408,771 (91.09%)	1,840,143 (4.36%)	22,546,341 (53.47%)	22,540,890 (53.45%)	21084021	6311696156	54.89	94.83
CK-R24h-2	54316576	51,280,090 (94.41%)	47,410,178 (87.28%)	3,869,912 (7.12%)	31,786,991 (58.52%)	31,620,424 (58.22%)	27158288	8126113978	53.99	93.78
CK-R24h-3	44414466	42,460,557 (95.60%)	40,857,250 (91.99%)	1,603,307 (3.61%)	23,145,108 (52.11%)	23,159,997 (52.15%)	22207233	6648216326	54.72	94.12
CK-S12h-1	49480560	47,597,027 (96.19%)	45,144,411 (91.24%)	2,452,616 (4.96%)	27,174,191 (54.92%)	27,084,551 (54.74%)	24740280	7407896342	54.84	95.07
CK-S12h-2	54974804	52,271,648 (95.08%)	50,099,358 (91.13%)	2,172,290 (3.95%)	28,795,787 (52.38%)	28,714,613 (52.23%)	27487402	8221396096	55.34	94.86
CK-S12h-3	43458386	41,541,513 (95.59%)	39,857,186 (91.71%)	1,684,327 (3.88%)	22,812,848 (52.49%)	22,808,534 (52.48%)	21729193	6504008074	54.52	94.85
CK-S24h-1	54586848	52,212,859 (95.65%)	48,546,222 (88.93%)	3,666,637 (6.72%)	31,342,163 (57.42%)	31,217,475 (57.19%)	27293424	8166236910	52.06	94.12
CK-S24h-2	49040310	47,169,656 (96.19%)	44,858,690 (91.47%)	2,310,966 (4.71%)	26,553,837 (54.15%)	26,505,471 (54.05%)	24520155	7342167242	54.21	95.45
CK-S24h-3	40035706	38,411,431 (95.94%)	36,548,024 (91.29%)	1,863,407 (4.65%)	21,692,338 (54.18%)	21,645,788 (54.07%)	20017853	5993192624	54.2	95.07
R12h-1	43515284	41,738,721 (95.92%)	39,926,565 (91.75%)	1,812,156 (4.16%)	23,352,392 (53.66%)	23,285,054 (53.51%)	21757642	6515844136	55.71	95.31
R12h-2	52895646	50,422,634 (95.32%)	47,958,346 (90.67%)	2,464,288 (4.66%)	28,356,373 (53.61%)	28,340,246 (53.58%)	26447823	7918814548	54.5	94.87
R12h-3	43576346	41,624,944 (95.52%)	40,015,475 (91.83%)	1,609,469 (3.69%)	22,601,964 (51.87%)	22,570,259 (51.79%)	21788173	6519212942	55.24	94.93
R24h-1	54251184	51,325,485 (94.61%)	49,252,126 (90.79%)	2,073,359 (3.82%)	28,237,563 (52.05%)	28,243,761 (52.06%)	27125592	8120761310	55.61	94.5
R24h-2	45125526	43,189,119 (95.71%)	41,272,554 (91.46%)	1,916,565 (4.25%)	24,090,635 (53.39%)	24,089,792 (53.38%)	22562763	6755203112	54.11	94.32
R24h-3	47935004	45,697,371 (95.33%)	43,748,950 (91.27%)	1,948,421 (4.06%)	25,238,413 (52.65%)	25,224,147 (52.62%)	23967502	7175276738	54.45	94.98
S12h-1	47305354	44,890,181 (94.89%)	43,175,861 (91.27%)	1,714,320 (3.62%)	24,520,987 (51.84%)	24,498,016 (51.79%)	23652677	7076745552	55.83	94.62
S12h-2	41438780	39,708,766 (95.83%)	37,655,455 (90.87%)	2,053,311 (4.96%)	22,698,591 (54.78%)	22,622,061 (54.59%)	20719390	6205448580	54.52	94.79
S12h-3	46054102	43,799,421 (95.10%)	41,852,266 (90.88%)	1,947,155 (4.23%)	24,343,349 (52.86%)	24,329,945 (52.83%)	23027051	6894674960	53.79	94.39
S24h-1	53585036	51,432,938 (95.98%)	48,531,510 (90.57%)	2,901,428 (5.41%)	30,224,037 (56.40%)	30,086,447 (56.15%)	26792518	8023092746	56.84	95.15
S24h-2	42267230	40,244,609 (95.21%)	38,535,759 (91.17%)	1,708,850 (4.04%)	22,474,876 (53.17%)	22,468,433 (53.16%)	21133615	6,,327386,252	56.04	95.12
S24h-3	43764300	41,859,738 (95.65%)	39,779,461 (90.89%)	2,080,277 (4.75%)	23,524,787 (53.75%)	23,504,376 (53.71%)	21882150	6551990078	54.06	94.95
