# Supplementary material for: Comparative transcriptome analysis of foxtail millet variety JG21 and resistant mutant unravels the key players associated with downy mildew resistance
Source: Research Square preprint supplement (doi:10.21203/rs.3.rs-7495945/v1), 2025-09-18
Supplement: Supplementary file 4 [file Table S4.xls]

## Sheet: Sheet1
Additional file 4 Table S4 Total 41common differentially expressed genes in JG21 and its mutant rdm12 at 12 h and 24 h
Genes	12 R(LOg2FC)	24 R(LOg2FC)	12 S(LOg2FC)	24 S(LOg2FC)	FDR	NR
Seita.3G037900	1.85181	1.85991	1.38723	3.64118	1.94089e-21	1-aminocyclopropane-1-carboxylate oxidase [Setaria italica]
Seita.3G038000	3.72238	2.17134	1.43281	3.71899	3.34233e-21	1-aminocyclopropane-1-carboxylate oxidase [Setaria italica]
Seita.1G042400	3.40581	3.46587	2.80976	3.37604	1.33581e-10	3-ketoacyl-CoA synthase 11 [Setaria italica]
Seita.5G308500	4.35948	2.05818	2.30136	5.54295	2.64298e-19	anthocyanidin 5,3-O-glucosyltransferase [Setaria italica]
Seita.5G280700	3.36248	2.32415	1.87672	3.57445	5.16165e-05	AP2/ERF and B3 domain-containing protein Os01g0693400 [Setaria italica]
Seita.8G242200	12.3076	7.29733	8.13179	0	1.07946e-15	aspartic proteinase nepenthesin-1 [Setaria italica]
Seita.9G300100	6.74575	2.27706	2.35013	1.88418	2.41066e-12	cysteine-rich receptor-like protein kinase 10 [Setaria italica]
Seita.2G238400	6.77698	3.88297	2.76301	1.72124	6.35939e-14	E3 ubiquitin-protein ligase ATL6 [Setaria italica]
Seita.9G241000	6.12727	3.46431	2.83832	-0.0352093	2.53678e-05	ent-cassadiene C2-hydroxylase [Setaria italica]
Seita.2G144900	14.1835	10.4557	8.00176	0	7.8716e-17	ent-copalyl diphosphate synthase 2 isoform X2 [Setaria italica]
Seita.7G232100	5.2095	1.74671	1.72413	6.53791	3.89392e-10	ethylene-responsive transcription factor 4 [Setaria italica]
Seita.9G320700	5.70735	2.75052	2.61989	4.2873	1.59138e-06	ethylene-responsive transcription factor ERF105 [Setaria italica]
Seita.9G342600	5.25807	4.03878	3.96297	4.99776	1.4679e-34	flavanone 3-dioxygenase 2 [Setaria italica]
Seita.5G203100	8.36814	4.85473	5.58042	2.45109	5.1591e-13	glucan endo-1,3-beta-glucosidase 12 [Setaria italica]
Seita.5G203600	10.8338	5.381	5.5158	0	7.6162e-12	glucan endo-1,3-beta-glucosidase 3 [Setaria italica]
Seita.3G038600	8.23914	3.69057	2.9391	3.97622	1.61546e-11	glutathione S-transferase 4 [Setaria italica]
Seita.5G168800	3.96656	2.33853	2.13865	2.75909	2.55819e-14	glutathione S-transferase 4 [Setaria italica]
Seita.8G089300	1.75316	1.69344	1.29176	2.07816	2.34947e-07	G-type lectin S-receptor-like serine/threonine-protein kinase At1g11330 [Setaria italica]
Seita.7G095600	9.20948	6.60119	7.68211	0	8.0256e-15	G-type lectin S-receptor-like serine/threonine-protein kinase At2g19130 [Setaria italica]
Seita.3G168900	4.22675	4.66829	2.4102	2.53943	0.000171066	heat stress transcription factor A-4d [Setaria italica]
Seita.7G117500	3.5538	2.44903	2.21624	6.64517	4.76591e-21	hepatoma-derived growth factor-related protein 2 [Setaria italica]
Seita.5G313300	7.51275	4.05505	2.79835	-0.0361397	8.82388e-06	leucine-rich repeat receptor-like serine/threonine-protein kinase BAM2 [Setaria italica]
Seita.4G105900	6.15269	3.93218	3.05717	6.36385	1.18646e-12	metalloendoproteinase 2-MMP [Setaria italica]
Seita.9G484700	2.78552	2.08197	1.71613	3.48801	8.26823e-36	mitogen-activated protein kinase kinase 9 [Setaria italica]
Seita.2G352700	3.35625	2.79835	2.86751	3.70414	1.72762e-10	organic cation/carnitine transporter 2 [Setaria italica]
Seita.5G175100	7.87661	3.29482	2.19574	5.73146	9.365e-14	pathogenesis-related protein PRMS [Setaria italica]
Seita.5G410400	5.36233	2.73169	3.02848	2.26394	3.03215e-25	pectin acetylesterase 5 [Setaria italica]
Seita.6G208700	4.6677	3.36306	2.66185	3.58468	1.26832e-19	probable L-type lectin-domain containing receptor kinase S.5 [Setaria italica]
Seita.9G381600	2.00756	2.34189	1.75346	3.17066	5.88075e-23	probable trehalose-phosphate phosphatase 9 [Setaria italica]
Seita.3G108500	5.21282	2.56386	2.20438	0	6.77645e-63	glutathione S-transferase 4 [Setaria italica]
Seita.3G139400	4.85204	3.44563	3.7763	2.16505	1.14884e-19	probable WRKY transcription factor 53 isoform X2 [Setaria italica]
Seita.5G057300	2.02205	1.82799	1.9842	2.71807	3.89644e-32	protein SENESCENCE-ASSOCIATED GENE 21, mitochondrial [Setaria italica]
Seita.2G137400	2.09082	1.62127	1.20439	2.33855	6.49806e-39	protein SRC2 homolog [Setaria italica]
Seita.5G024100	5.94869	4.05528	2.54989	6.17302	1.17875e-05	putative methyltransferase DDB_G0268948 [Setaria italica]
Seita.3G173800	5.52185	3.5845	2.54619	2.75643	3.17045e-07	receptor-like protein kinase HSL1 [Setaria italica]
Seita.2G144400	11.1929	7.93889	5.71678	0.647289	4.35389e-51	stemar-13-ene synthase [Setaria italica]
Seita.2G352200	2.33659	3.19205	2.56424	2.55379	3.22041e-38	sugar transport protein MST6 [Setaria italica]
Seita.9G063400	3.06907	1.45028	1.66192	3.6631	8.18217e-27	syntaxin-121 [Setaria italica]
Seita.3G399900	9.54786	6.3159	5.77769	3.53342	3.38627e-26	thaumatin-like protein [Setaria italica]
Seita.5G377300	2.49251	1.99429	1.39898	4.02567	1.51071e-32	triosephosphate isomerase, cytosolic [Setaria italica]
Seita.7G223900	7.08177	4.65264	4.48259	3.90978	4.01147e-24	ubiquinol oxidase 1b, mitochondrial isoform X1 [Setaria italica]
