# Supplementary material for: Comparative transcriptome analysis of foxtail millet variety JG21 and resistant mutant unravels the key players associated with downy mildew resistance
Source: Research Square preprint supplement (doi:10.21203/rs.3.rs-7495945/v1), 2025-09-18
Supplement: Supplementary file 5 [file Figure S1.docx]

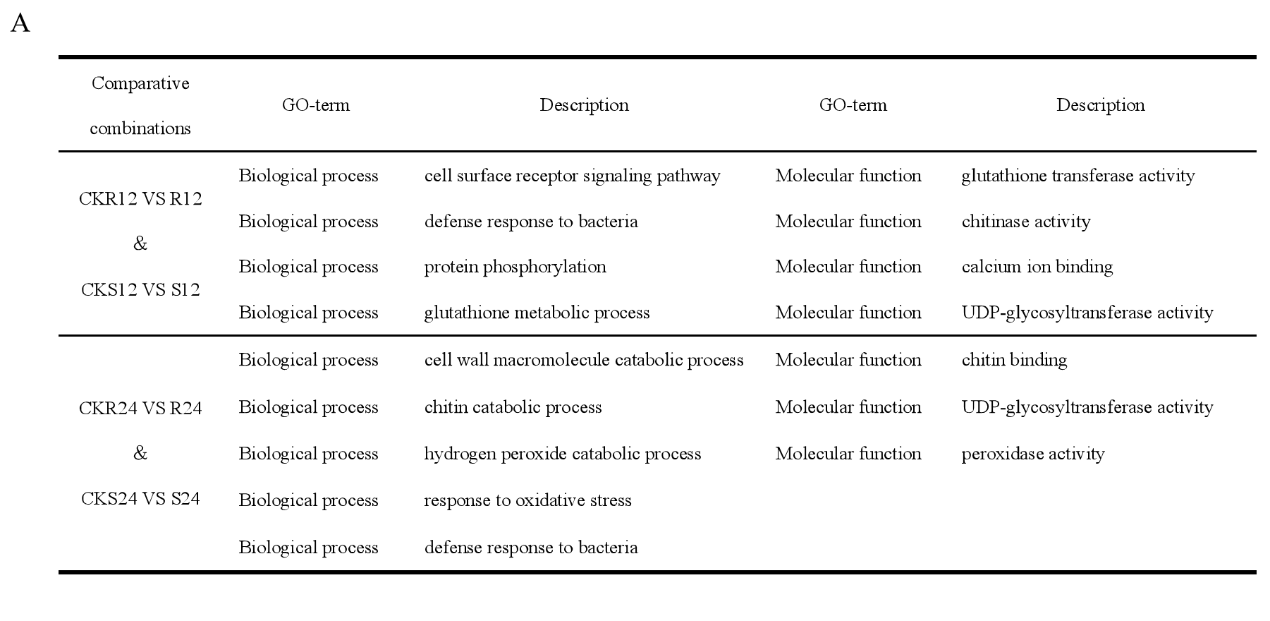

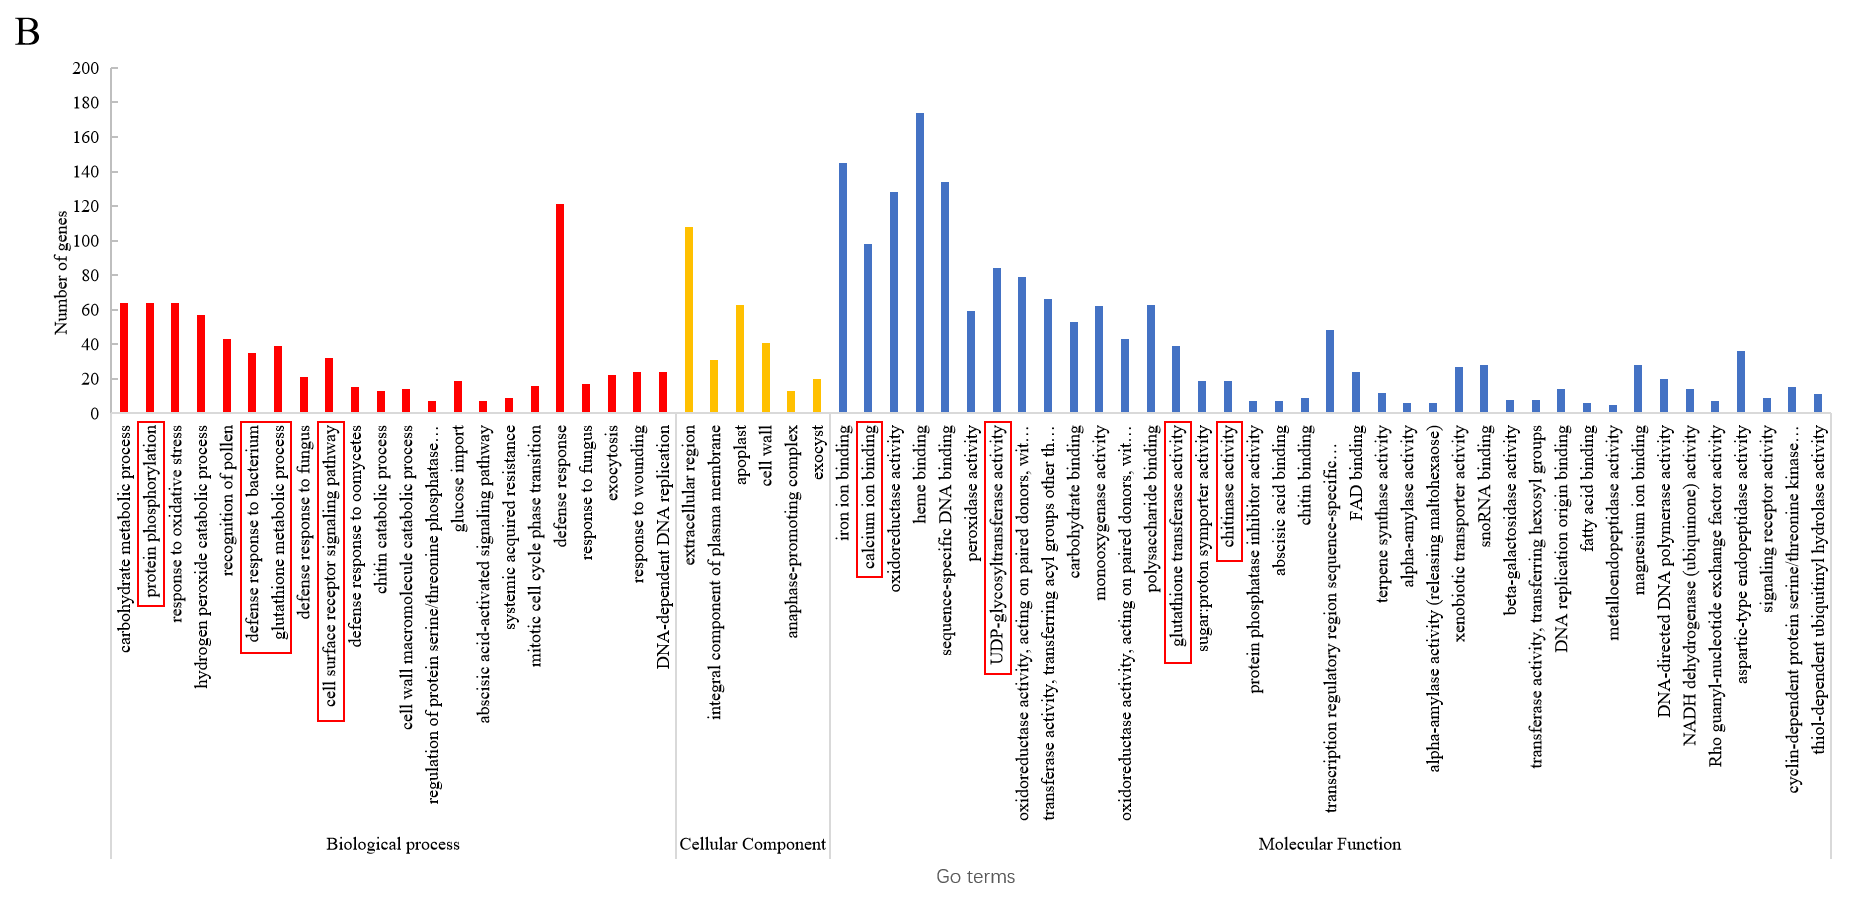

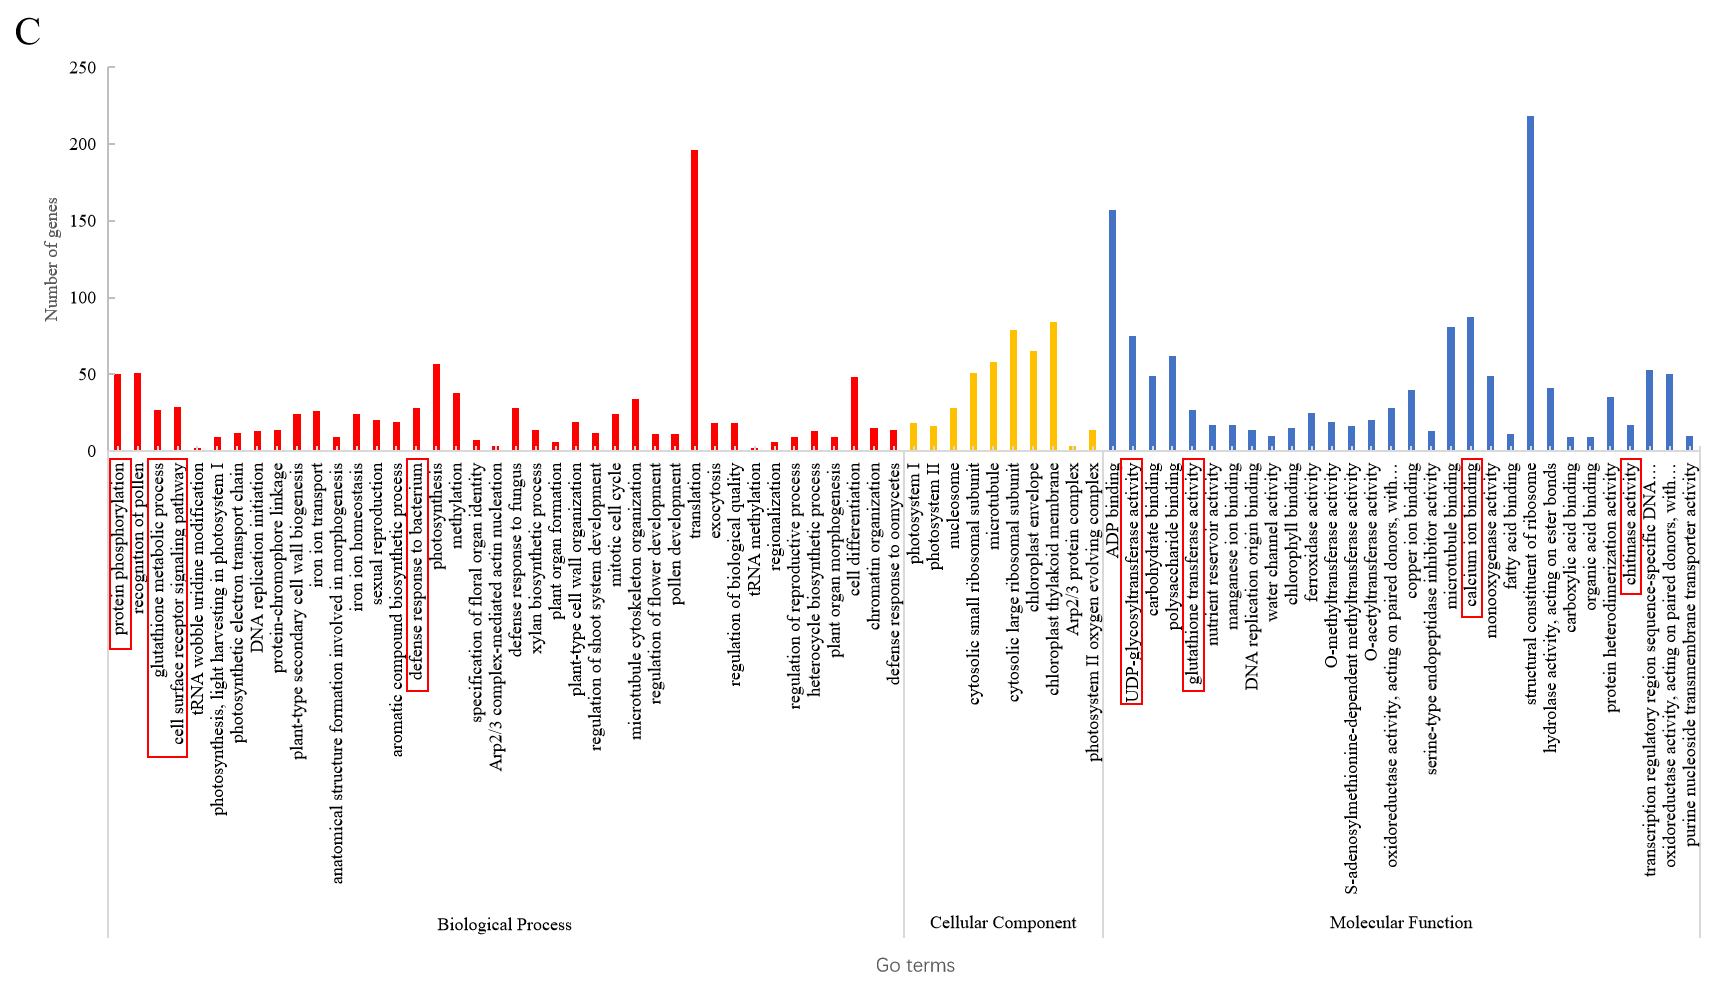

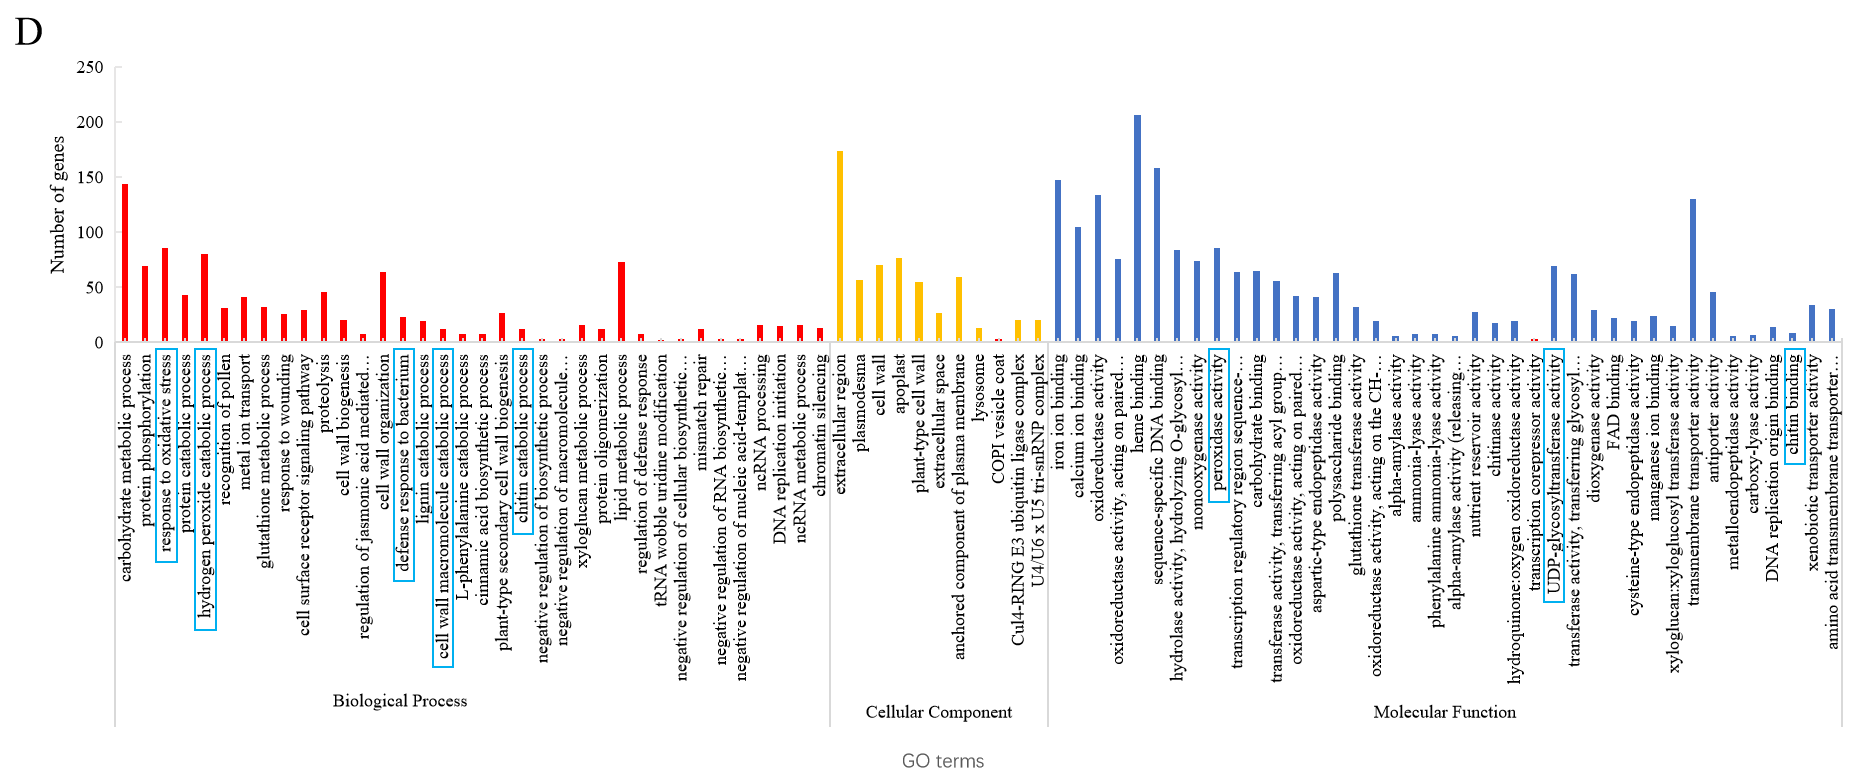

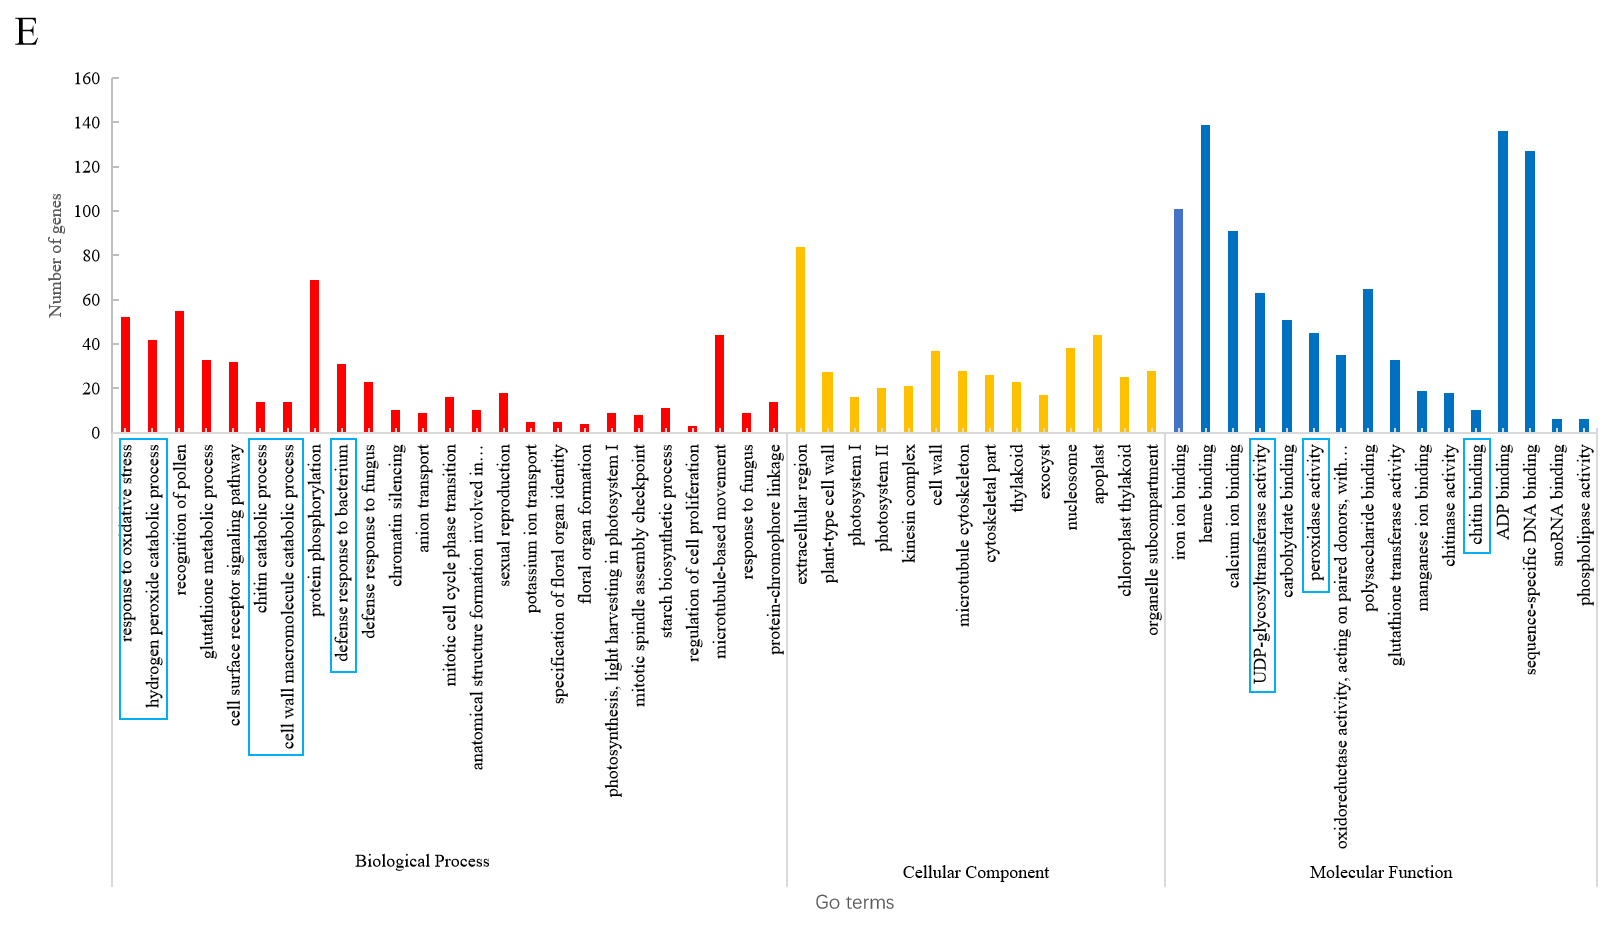


Figure S1 GO enrichment results of differentially expressed genes (DEGs) in JG21(S) and mutant rdm12(R) at 12 and 24 hours post-inoculation with *S. graminicola*. (A) Critical GO metabolic pathways for DEGs between the two comparison combinations. (B) GO metabolic pathway enrichment of DEGs between CKR12 and R12. (C) GO metabolic pathway enrichment of DEGs between CKS12 and S12. (D) GO metabolic pathway enrichment of DEGs between CKS24 and S24. (E) GO metabolic pathway enrichment of DEGs between CKR24 and R24.
